# Supplementary material for: Self-healable hydrogels with NaHCO3 degradability and a reversible gel–sol–gel transition from phenolic ester containing polymers
Source: Royal Society of Chemistry journal article supplement (doi:10.1039/c7ra05854c), 2017-01-01
Supplement: c7ra05854c1.pdf [file c7ra05854c1.pdf]

## Supplementary Information

# Self-Healable Hydrogels with NaHCO<sub>3</sub> Degradability and Reversible Gel-Sol-Gel Transition from Phenolic Ester Containing Polymers

Heng An<sup>1</sup>, Xu Li<sup>1</sup>, Xuehong Fu<sup>1</sup>, Juan Hu<sup>1</sup>, Xiaojie Lang<sup>1</sup>, Xiaoyu Liu<sup>1</sup>, Yong Wang<sup>2</sup>, Haijun Wang<sup>1</sup>,  
Ruixue Chang<sup>1</sup>, Jianglei Qin<sup>1\*</sup>

<sup>1</sup>College of Chemistry and Environmental Science, Hebei University, Baoding 071002, China.

<sup>2</sup>College of Basic Medical Science, Hebei University, Baoding 071002, China.

Corresponding Authors' email addresses: [qinhbu@iccas.ac.cn](mailto:qinhbu@iccas.ac.cn)

## Contents

## Figures

Fig. S1 DSC curves of the copolymers at 20 °C min<sup>-1</sup> heating rate.

Fig. S2 Hydrogel prepared P(DMA<sub>199</sub>-*stat*-FPA<sub>4</sub>) with DTPDH cross-linking.

Fig. S3. Hydrogel prepared P(DMA<sub>199</sub>-*stat*-FPA<sub>4</sub>) with PEO<sub>90</sub> dihydrazide cross-linking.

Fig. S4 Repeated self-healing of the hydrogel under stretching (a) and subjected to gravity (b).

Fig. S5 The self-healable hydrogel can also be degraded by N(C<sub>2</sub>H<sub>5</sub>)<sub>3</sub>.

Fig. S6 Hydrogel prepared from P(DMA<sub>104</sub>-*stat*-FPA<sub>8</sub>) and PEO<sub>90</sub> dihydrazide can also be cleaved by PEO dihydrazide.

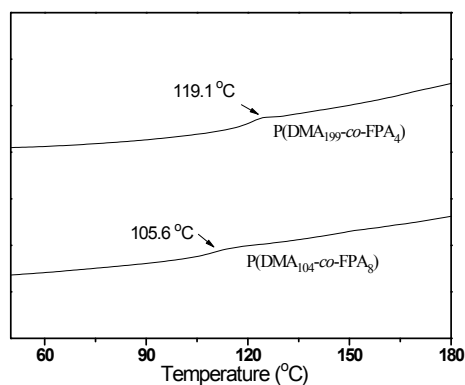

Fig. S1 DSC curves of P(DMA-*stat*-FPA) copolymers.

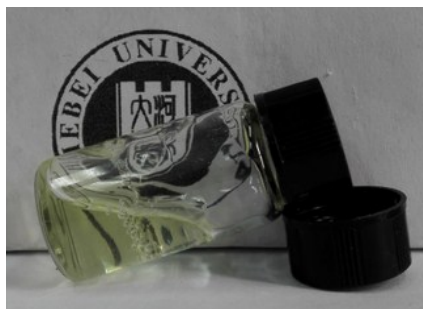

Fig. S2 Hydrogel prepared P(DMA<sub>199</sub>-*stat*-FPA<sub>4</sub>) with DTPDH cross-linking.

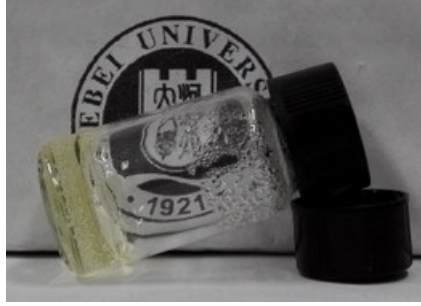

Fig.S3 Hydrogel prepared P(DMA<sub>199</sub>-*stat*-FPA<sub>4</sub>) with PEO<sub>90</sub> dihydrazide cross-linking.

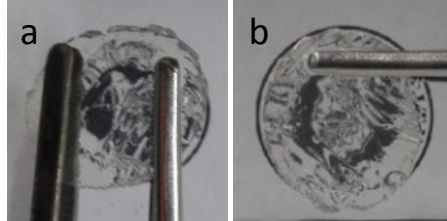

Fig. S4 Repeated self-healing of the hydrogel under stretching (a) and subjected to gravity (b).

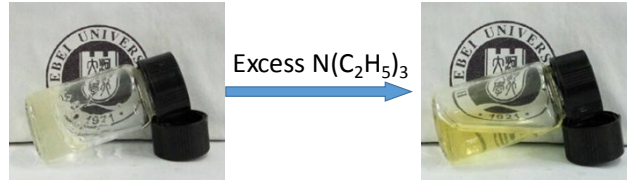

Fig. S5 The self-healable hydrogel can also be degraded by N(C<sub>2</sub>H<sub>5</sub>)<sub>3</sub>.

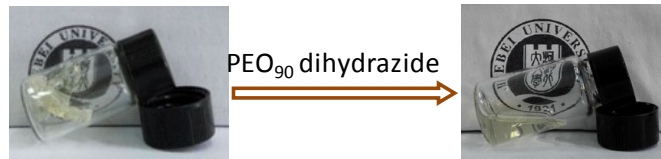

Figure S6. Hydrogel prepared from P(DMA<sub>104</sub>-*stat*-FPA<sub>8</sub>) and PEO<sub>90</sub> dihydrazide can also be degraded by PEO dihydrazide.
